# Supplementary material
Source: publisher site journal article supplement (https://www.dovepress.com/article/410574)
Supplement: Supplementary file 1 [file get_supplementary_file.php]

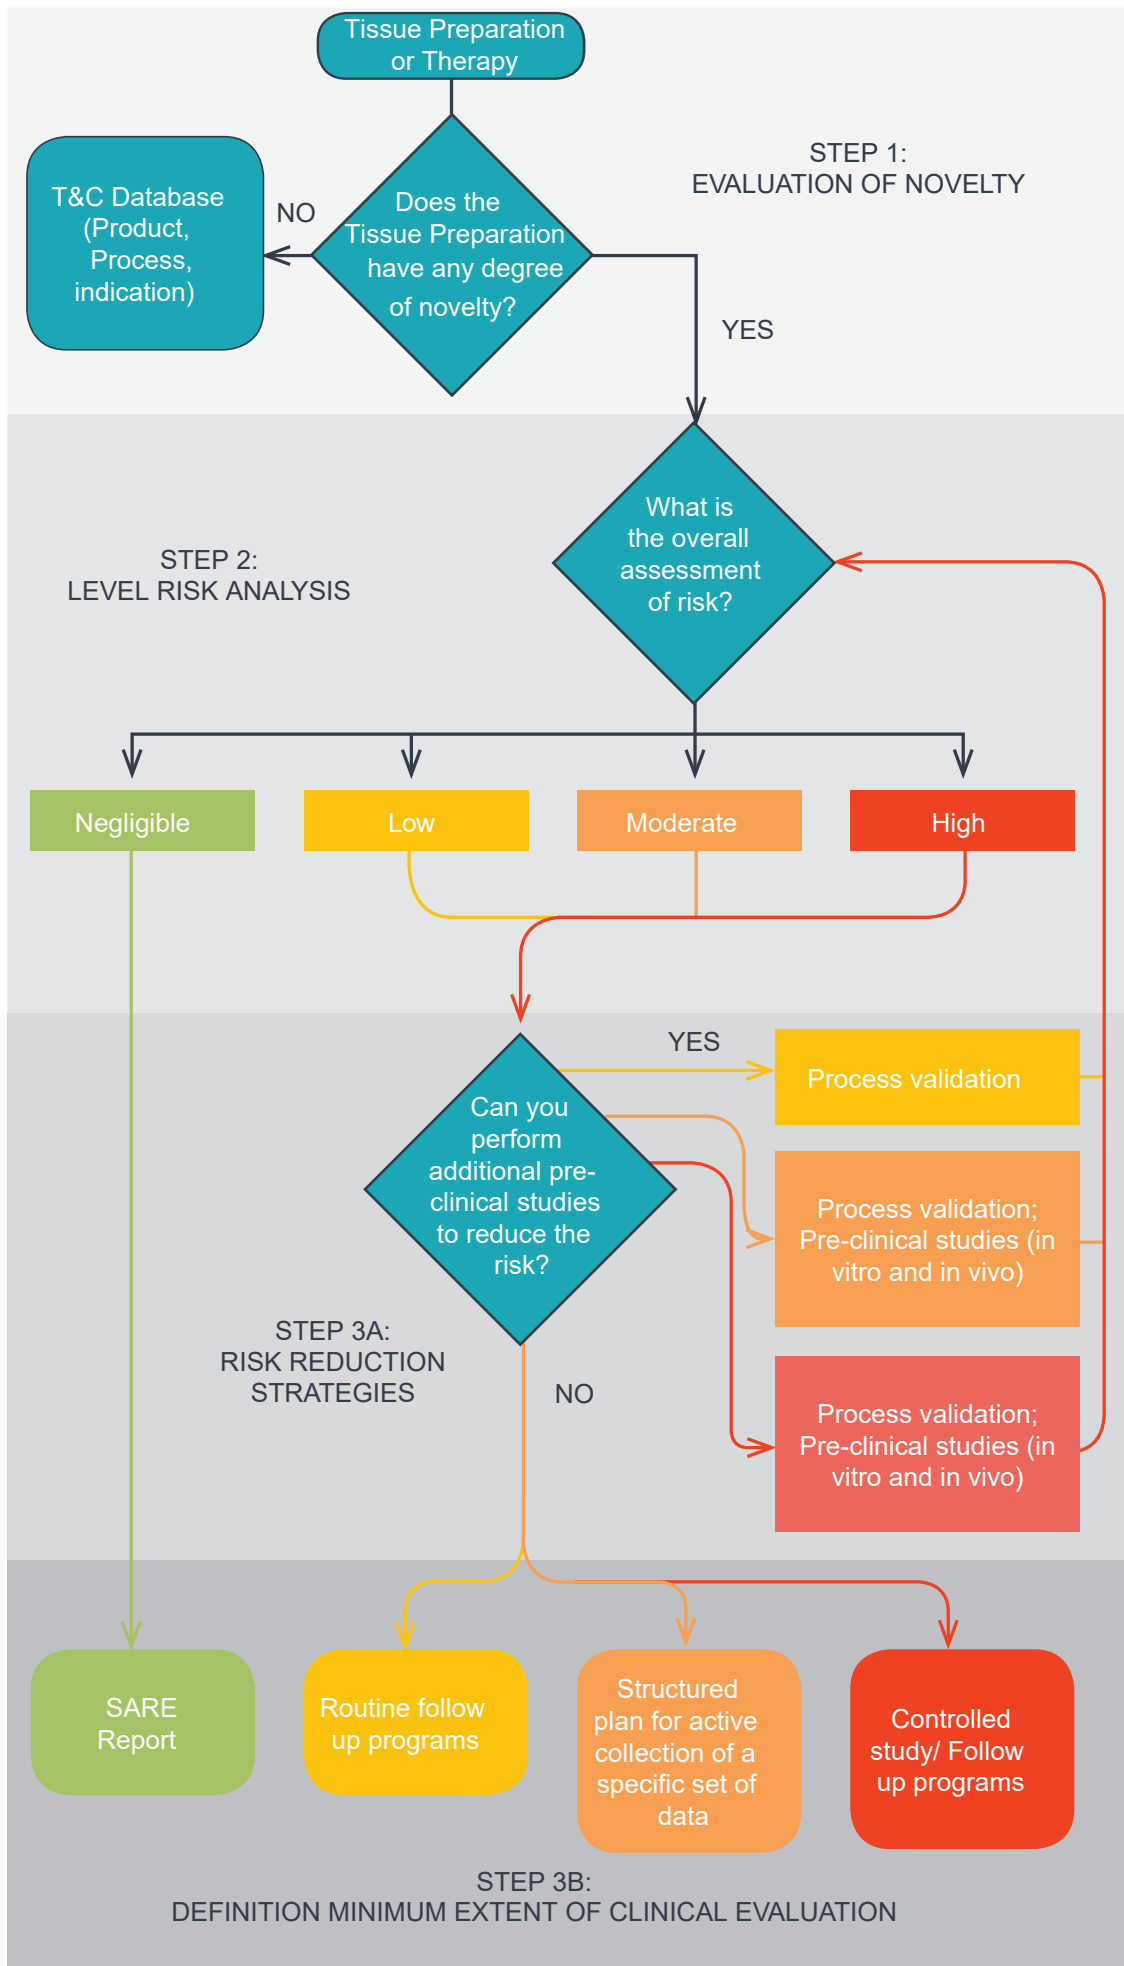

Supplementary Figure 1. Flowchart summarizing EuroGTP II methodologies

**Supplementary Table 1.** Definitions of the different levels of probability

| LEVEL OF PROBABILITY | DEFINITION                           |
|----------------------|--------------------------------------|
| 1 - Rare             | Difficult to believe it could happen |
| 2 - Unlikely         | Not expected to happen but possible  |
| 3 - Possible         | May occur occasionally               |
| 4 - Likely           | Probable but not persistent          |
| 5 - Almost certain   | Likely to occur on many occasions    |

**Supplementary Table 2.** Definitions of the different levels of severity

| LEVEL OF SEVERITY   | DEFINITION                                                                                                                                                                                                                                                                                                                             |
|---------------------|----------------------------------------------------------------------------------------------------------------------------------------------------------------------------------------------------------------------------------------------------------------------------------------------------------------------------------------|
| 1- Non-serious      | Mild clinical or psychological consequences for the recipient, however with no hospitalisation, or anticipated long term consequences/disability                                                                                                                                                                                       |
| 2- Serious          | Hospitalisation and/or:<br>Persistent/significant disability or incapacity<br>Intervention to preclude permanent damage<br>Evidence of a serious transmitted infection<br>Significant decrease in the expected treatment success<br>Birth of a child with an infectious or genetic disease following ART with donor gametes or embryos |
| 3- Life-threatening | Major intervention necessary to prevent death<br>Evidence of a life threatening transmissible infection<br>Birth of a child with life threatening genetic disease following ART with donor gametes of embryos                                                                                                                          |
| 4 - Fatal           | Death of the patient                                                                                                                                                                                                                                                                                                                   |

**Supplementary Table 3.** Definitions of the different levels of detectability

| LEVEL OF DETECTABILITY |  | DEFINITION                                                                                                           |
|------------------------|--|----------------------------------------------------------------------------------------------------------------------|
| 1 - Very high          |  | The potential defect will almost certainly be detected before clinical application in the recipient                  |
| 2 - Moderately high    |  | There is a reasonable chance that the potential defect will be detected before clinical application in the recipient |
| 3- Low                 |  | There is a low chance that the potential defect will be detected before clinical application in the recipient        |
| 4 – Very low           |  | It is unlikely that the potential defect will be detected before clinical application in the recipient               |
| 5 - Cannot be detected |  | The potential defect will be detected only after clinical application in the recipient                               |

**Supplementary Table 4.** Definitions of the different percentages of risk reduction

| PERCENTAGE RISK REDUCTION |             | DEFINITION                                                                                                                                                                                                                                              |
|---------------------------|-------------|---------------------------------------------------------------------------------------------------------------------------------------------------------------------------------------------------------------------------------------------------------|
| 0                         | None        | There is no relevant data available to support reducing the calculated risk score                                                                                                                                                                       |
| 25                        | Limited     | There is a moderate relevant data available to support reducing the calculated risk score, based predominantly on unpublished data                                                                                                                      |
| 50                        | Moderate    | There is moderate amount of good quality relevant data available to support reducing the calculated risk score, including published and unpublished data from external sources, and some data which has been through an independent peer review process |
| 75                        | Substantial | There is high quality relevant data to support reducing the calculated risk score, including data that has been peer reviewed and published                                                                                                             |
| 95                        | Extensive   | There is an extensive amount of high quality relevant data, including multiple peer reviewed publications, that demonstrates that the probability of the risk occurring, having a significant impact, and/or being undetected is negligible             |
